# Supplementary material for: Self-targeted knockdown of CD44 improves cisplatin sensitivity of chemoresistant non-small cell lung cancer cells
Source: Springer Nature journal article supplement (doi:10.1007/s00280-018-3737-y), 2018-12-04
Supplement: MOESM3 [file 16313748]

**Supplemental Materials and Methods**

**Preparation of HA-liposomes**

Aminated liposomes composed of hydrogenated soybean phosphatidylcholine (HSPC), distearoylphosphatidylethanolamine-polyethylene glycol-amine (DSPE-PEG-amine, 2 kDa), and cholesterol (Chol) at molar ratios of 3:1:1 (HSPC:DSPE-PEG:Chol) were prepared following a lipid film method. The resulting liposomes were extruded into unilamellar nanoscale liposomes using a Thermobarrel Lipex extruder™ (Lipex Biomembranes, Inc., Vancouver, British Columbia, Canada) with Nucleopore 100-nm pore-sized polycarbonate membranes (Avanti Polar Lipids) for 10 cycles (25). HA-coated liposomes (HA-liposomes) were prepared by coating aminated liposomes with high- or low-molecular weight HA. 1 mg of 5- or 700-kDa HA (Lifecore Biomedical), 0.1 mg ethylcarbodiimide hydrochloride (Sigma), and 0.3 mg of *N*-hydroxysulfosuccinimide sodium salt were dissolved in 1 mL of MES buffer (50 mM, pH 5.0) and incubated for 2 h for HA activation. Prepared liposomes were mixed with activated HA at a 1:1 volume ratio and incubated overnight. Unbound HA was removed by ultracentrifugation (Hanil Science Industrial Co., Ltd., Gimpo, Korea) at 1.0 × 105 *g* for 1 h.

**Cellular uptake of HA-liposomes**

H522, H2087, H1299, and H1793 cells were seeded (1 × 105 cells/well) in round cover slides in 12-well plates and cultured for 24 h. After washing with PBS, the cells were incubated with 50 μg/mL of liposomes or HA-liposomes labeled with 1,1ʹ-dioctadecyl-3,3,3ʹ,3ʹ-tetramethylindocarbocyanine perchlorate (DiI; Thermo Fisher Scientific) for 30 min. Following incubation, the cells were washed thrice with cold PBS, fixed with 4% formaldehyde, and their nuclei were stained using Mounting Medium with 2-(4-amidinophenyl)-1H-indole-6-carboxamidine (DAPI, VECTASHIELD, Vector Labs, Burlingame, CA, USA). The intracellular distribution of DiI-labeled liposomes was examined using a confocal laser scanning microscope (observer z1, Zeiss, Wetzlar, Germany).

**Preparation of siRNA-loaded HA-liposomes**

siRNAs (Dharmacon, Lafayette, CO, USA) were deprotected and annealed according to the manufacturer’s instructions before liposomal encapsulation. The ON-TARGETED plus SMART pool of CD44 siRNA sequences has been described previously. siRNAs were mixed with full-length recombinant protamine (Sigma, P336) at a 1:1 molar ratio in diethyl dicarbonate-treated water (Ambion, Inc., Foster City, CA, USA) and incubated for 30 min at room temperature for complex formation (26). For siRNA loading, lyophilized liposomes (1 mg of lipids) were rehydrated by adding 0.2 mL diethyl dicarbonate-treated water containing the siRNA-protamine complex (1000 pmol siRNA) and 10% sucrose. The loading procedure was performed immediately before use. The hydrodynamic size of siRNA-loaded HA-liposomes was measured by dynamic light scattering with a Malvern Zetasizer Nano-S (Malvern, Instruments, Malvern, UK).
